# Supplementary material for: High-Resolution Flood Monitoring Based on Advanced Statistical Modeling of Sentinel-1 Multi-Temporal Stacks
Source: MDPI journal article supplement (doi:10.3390/rs16020294), 2024-01-11
Supplement: s1 [file s1]

Archive with 3 entries (3 files):
- S1.pdf
- S2.pdf
- S3.pdf
