# Supplementary material for: High-Resolution Flood Monitoring Based on Advanced Statistical Modeling of Sentinel-1 Multi-Temporal Stacks
Source: MDPI journal article supplement (doi:10.3390/rs16020294), 2024-01-11
Supplement: s1 [file s1]

1)

2)

3)

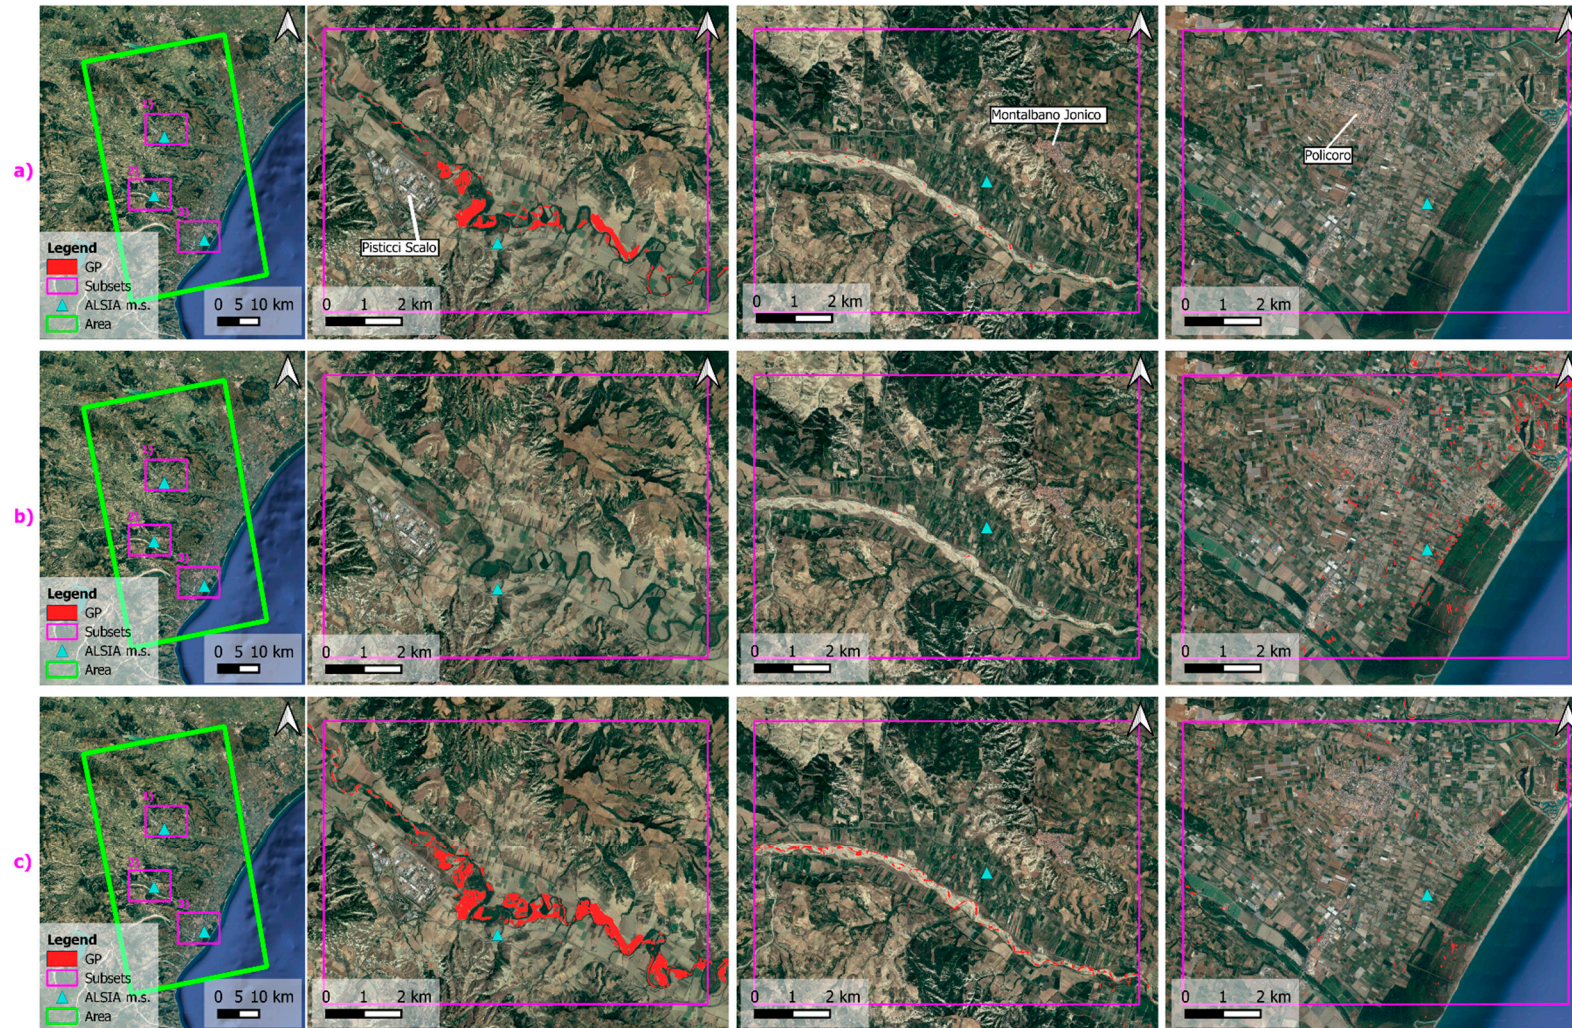



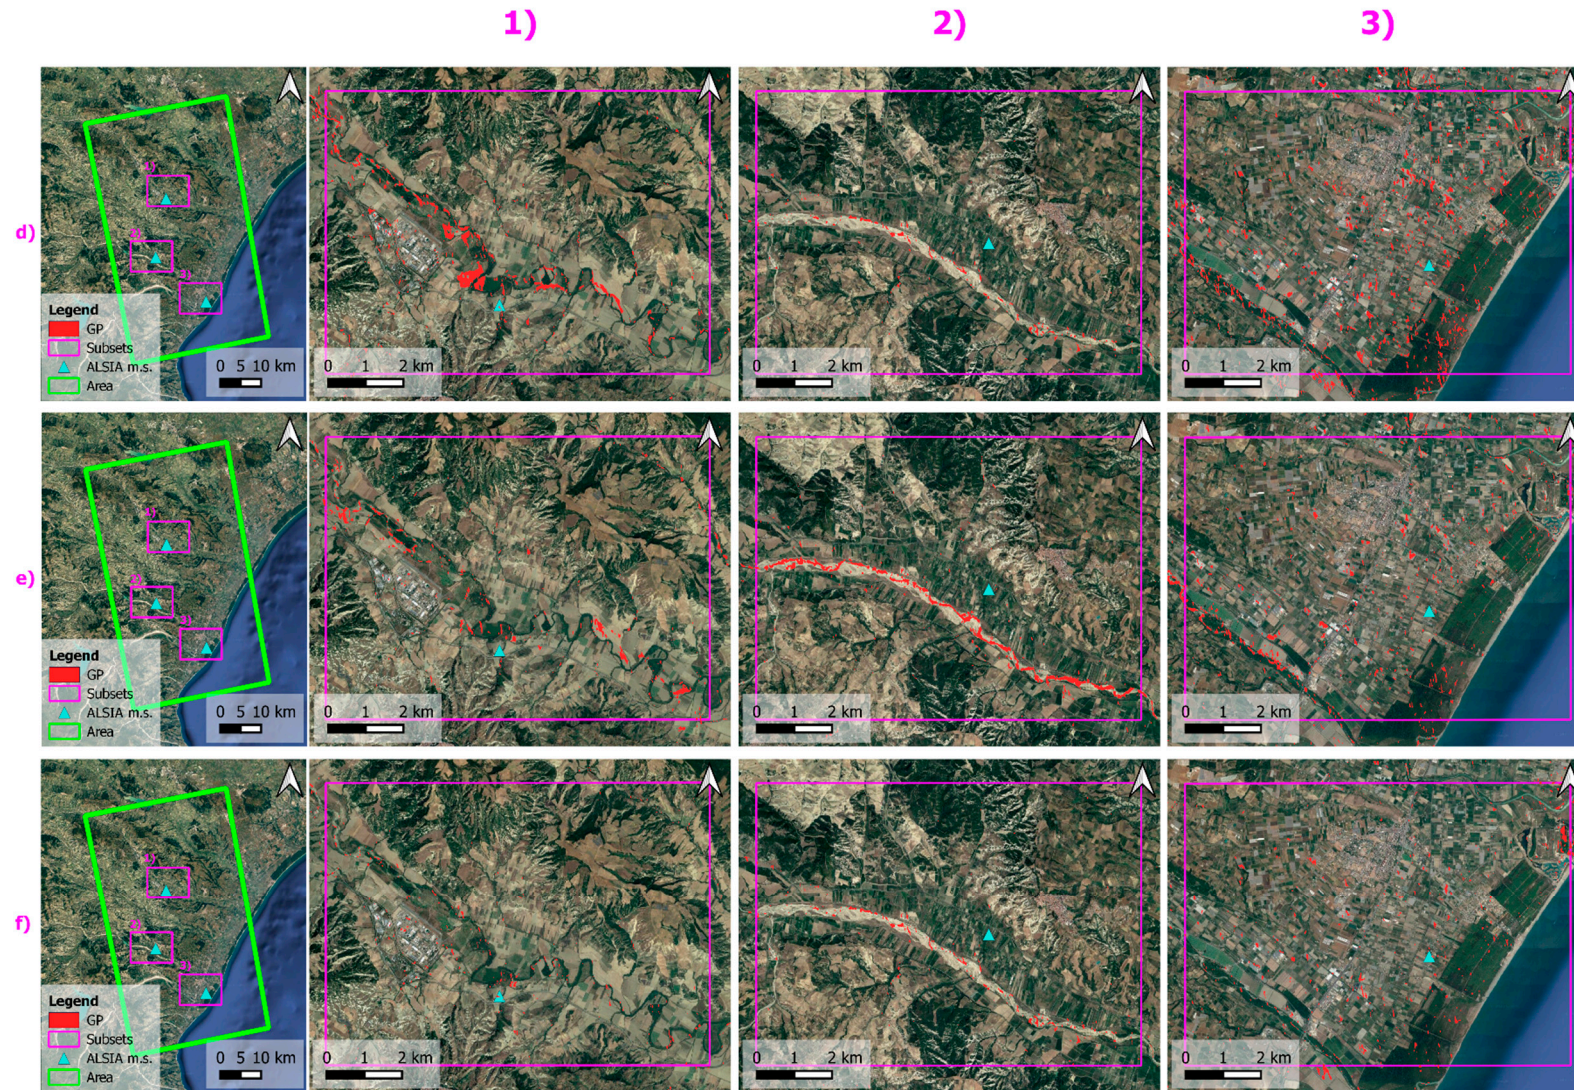

**Figure S3.** Flood maps of detected events in Table 2. Results, applying a threshold of 0.9, are shown for 6 particular events (S3-a, S3-b, S3-c, S3-d, S3-e, S3-f) on all 3 identified sub-areas (columns 1, 2, 3). Base map: Google satellite. For each map on the left, magenta rectangles are shown at the right.
