# Supplementary material for: High-Resolution Flood Monitoring Based on Advanced Statistical Modeling of Sentinel-1 Multi-Temporal Stacks
Source: MDPI journal article supplement (doi:10.3390/rs16020294), 2024-01-11
Supplement: s1 [file s1]

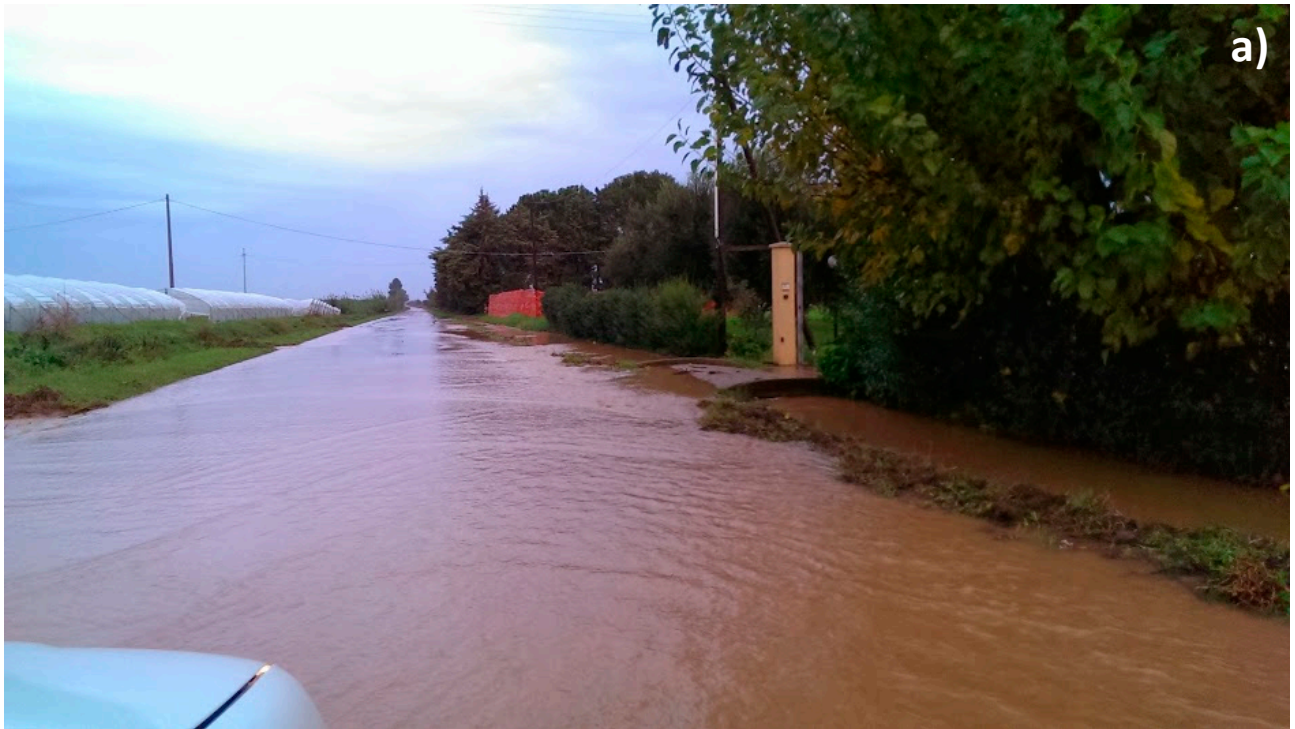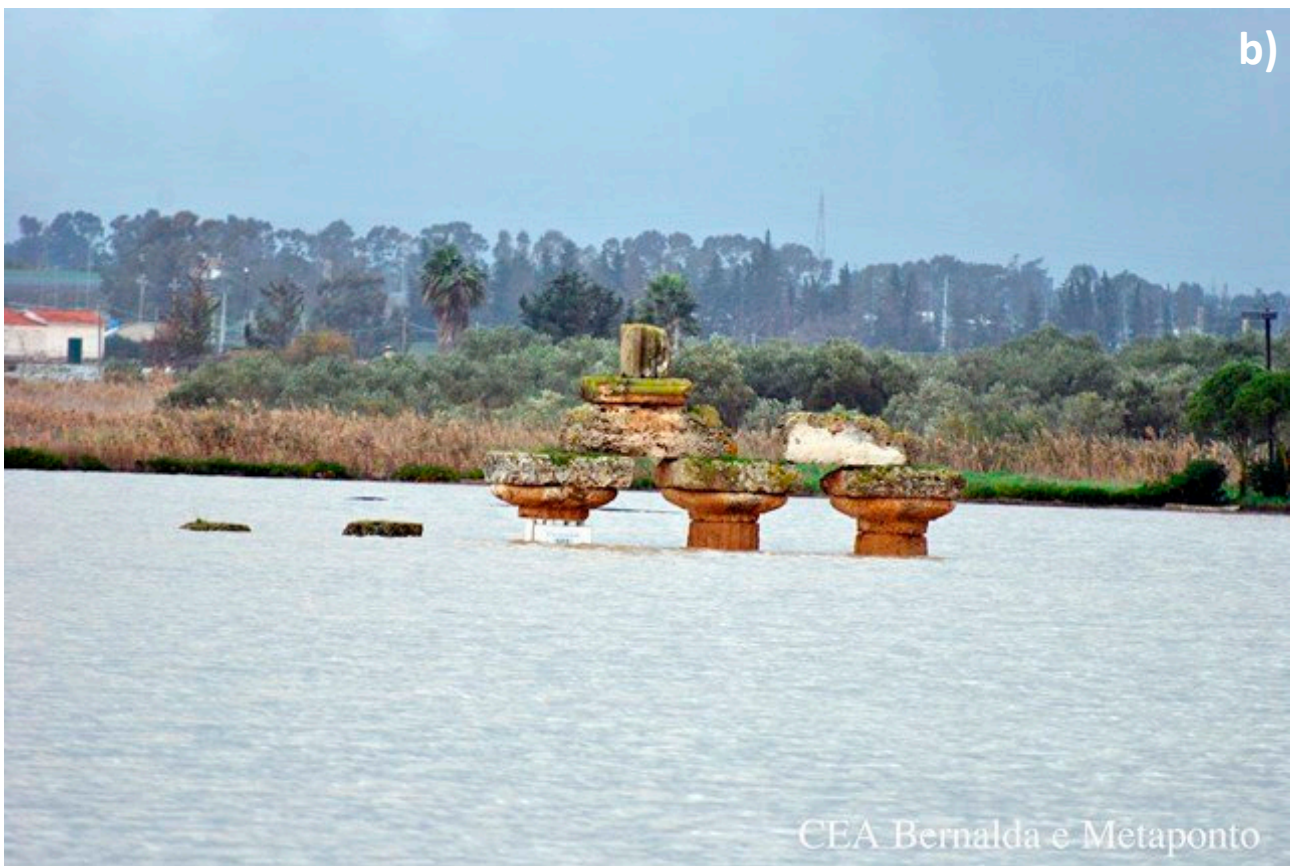

**Figure S1.** Flooding in Basilicata region. Images show impacts of flooding events on infrastructures, agricultural/geo-touristic activities (a) [S1-1], and archaeological heritage (b) [S1-2].

## References

[S1-1] Basilicata Magazine. Available online: <https://www.basilicatamagazine.it/farepisticci-su-dissesto-idrogeologico/> (accessed on 08 November 2023).

[S1-2] CEA Bernalda e Metaponto. Available online: <http://www.ceabernaldametaponto.it/index.php/attivita/la-riserva-di-metaponto/93-2-dicembre-2013-le-news-dal-territorio-nel-secondo-giorno-di-emergenza-meteo> (accessed on 08 November 2023).
